# Supplementary material for: Identification of novel mammalian growth regulatory factors by genome-scale quantitative image analysis
Source: HighWire-hosted journal article supplement (doi:10.1101/gr.3889305), 2005-07-15
Supplement: harada_table_5.pdf [file harada_table_5.pdf]

Table 4 (supplemental)

| <div>Clone ID</div> <div>Assay</div>                             | Gatp2 | Gatp1 | LRRK1 | Ptges | Ankrd25 | DNAJA1 | BC013092 | Atoh1 | BC019960 | BC005427 | EZH2 | Inhbe | BC023323 | BC005633 | SPINT2 |
|------------------------------------------------------------------|-------|-------|-------|-------|---------|--------|----------|-------|----------|----------|------|-------|----------|----------|--------|
| Avg. Fractional Change Conf. – U2OS <sup>a</sup>                 | 3.3   | 1.5   | 3.1   | 4.7   | 1.3     | 1.9    | 1.9      | 1.3   | 1.5      | 3.3      | 2.5  | 1.2   | 1.9      | 1.7      | 3.7    |
| Growth in 0.5% Serum – 293 <sup>b</sup>                          | 1.8   | 1.5   | 1.8   | 2.2   | 2.0     | 1.7    | 2.0      | 1.2   | 1.7      | 1.9      | 1.2  | 1.2   | 1.9      | 1.2      | 1.5    |
| Growth Advantage in CEF <sup>c</sup>                             | +     | +     | +     | +     | +       | +      | +        | +     | +/-      | -        | -    | +/-   | +        | +/-      | +/-    |
| Focus Formation in CEF <sup>d</sup>                              | +     | +     | +     | +     | +/-     | -      | -        | -     | -        | -        | ND   | ND    | ND       | -        | +      |
| Soft Agar Assay – CEF <sup>e</sup>                               | +     | +     | +     | +     | +       | +      | -        | -     | -        | +        | ND   | ND    | ND       | ND       | +      |
| Effect on Growth by SMARTpool in NIH3T3 – 10% serum <sup>f</sup> | -     | -     | ND    | -     | -       | ND     | ND       | ND    | ND       | ND       | ND   | ND    | ND       | ND       | ND     |
| Effect on Growth by SMARTpool in NIH3T3 – 1% serum               | -     | +     | ND    | -     | -       | ND     | ND       | ND    | ND       | ND       | ND   | ND    | ND       | ND       | ND     |

<sup>a</sup> cDNA activities were confirmed in the primary screening assay in quadruplicate. Values reflect average changes in GFP positive cell fraction observed at read 2 relative to read 1 (Fractional Change = % GFP positive fraction Read 2 / % GFP positive fraction Read 1). Data is presented relative to pCMV control (Fractional Change = 1.0).

<sup>b</sup> Effects of primary screen hits were evaluated in 293 cells using the Cell-Titer Glo™ luminescent cell viability assay. Average normalized values from four independent experiments performed in quadruplicate are shown (pCMV control = 1.0).

<sup>c</sup> Growth kinetics of activator-expressing CEF were monitored over 5 days in culture. “+” indicates that stable expression of putative activator clones conferred a growth advantage relative to RCAS-A vector control in at least two independent experiments performed in quadruplicate.

<sup>d</sup> Activator clones were evaluated for their ability to induce multi-layered growth in CEF. “+/-” indicates that foci were not observed by crystal violet staining, but morphological changes were consistently observed by light microscopy. ND = not done.

<sup>e</sup> The ability of growth activator clones to induce anchorage independent growth was assessed in colony formation assays in soft agar suspension culture.

<sup>f</sup> The requirement for hit clones in cell growth was determined in NIH3T3 cells using siRNA oligonucleotide pools (SMARTpool, Dharmacon) to abrogate target gene expression. “+” denotes that a reduction in growth rate was observed in the presence of siRNA in at least four independent experiments performed in quadruplicate.
